# Supplementary material for: Polymerizable bijels prepared by a direct-mixing method
Source: Royal Society of Chemistry journal article supplement (doi:10.1039/d3cc04194h), 2023-01-01
Supplement: d3cc04194h1.pdf [file d3cc04194h1.pdf]

## Supplementary Information for Polymerizable bijels prepared by a direct-mixing method

Liya Zhang, Aixin Song\* and Jingcheng Hao\*

*Key Laboratory of Colloid and Interface Chemistry (Ministry of Education), Shandong University,*

*Jinan 250100, China*

### 1. Materials and methods

#### 1.1 Materials

Silicon particles (~ 20 nm in diameter) and aminopropyl terminated polydimethyl siloxane (diNH<sub>2</sub>-PDMS) with Mw of 3000 and fluorescein sodium (FLS) were purchased from Macklin (Shanghai, China). Polydimethylsiloxane acrylate (PDMS-AR) (JHB-170) was obtained from Mingcheng Plastic Chemical Auxiliary (Guangdong, China). 2, 2-Diethoxyacetophenone (GC) was produced from Aladdin Industrial Co., Ltd. (China). N, N-bis (2,6-diisopropylphenyl)-1,6,7,12-tetraphenoxy-3,4,9,10-perylene-tetracarboxylic diimide (ROT 300) was produced by J&K Scientific Ltd. (Beijing, China). The deionized water with a resistivity of 18.2 MΩ·cm (25 °C) was obtained from UPH-IV ultrapure water apparatus (China). All reagents were used directly without further purification.

#### 1.2 Sample preparation

The sample of bijel was prepared as follows: different amounts of diNH<sub>2</sub>-PDMS, PDMS-AR with 2 wt% 2, 2-Diethoxyacetophenone were mixed uniformly in a 5 mL slender glass bottle. Next, appropriate amounts of SiO<sub>2</sub> and H<sub>2</sub>O were added, and then the mixture was stirred for 2 minutes using the vortex. The polymerizable bijel can be obtained by placing the resulting emulsion under a xenon lamp (PLS-SEX300/300UV, Beijing) and initiating polymerization with 365nm UV light for 2 hours. The final solid sample was placed in air for one week to obtain aerogel sample.

#### 1.3 Characterizations

Fourier transform infrared spectroscopy measurements (FTIR, VERTEX-70/70v

spectrometer, Bruker Optics, Germany) were utilized to analyze the characteristic groups of functional polymers and SiO<sub>2</sub>. Zeta potential were measured on a Zetasizer Nanoseries (Malvern Instruments Ltd). The three-phase contact angles were tested by a contact angle analyzer instrument (Krüss DSA100, Germany), for which the same sample was repeatedly measured three times. For measurements, the particles were pressed to be flat discs and immersed in oil, and then the water phase was dropped onto the flat disc to test the contact angles ( $\theta$ ). The interfacial tension was tested by surface tension meter (Dataphysics DCAT21, Germany) with hanging plate method. Super-resolution laser confocal scanning microscope (TCS SP8, Leica, Germany) was used to view the structures of emulsion samples. The freshly prepared sample was placed on a microscopy slide, and the observation was carried out before the sample starts to dry in the air. The 525 nm and 488 nm lasers were respectively provided to excite the fluorescence of oil-soluble ROT 300 and water-soluble FLS. Rheological measurements were performed on a HAAKE RS75 rheometer with a cone-plate system (C35/1°Ti L07116, diameter: 35 mm, cone angle: 1°). In oscillatory measurements, a stress sweep at a fixed frequency of 1 Hz was carried out to select a stress in a linear viscoelastic region, which was unchangeable in the frequency sweep ranging from 0.1 to 10 Hz. The microstructures of polymerized samples were characterized by scanning electron microscope (ZEISS G300, Germany) and super-resolution laser scanning confocal microscope (TCS SP8, Leica, Germany).

#### **1.4 Image analysis**

The 3D construction of bijel was obtained by 3D viewer plugin of image J2<sup>1</sup> through laser confocal section images, and the channel diameters were also measured by image J2. The curvatures were analyzed by Avizo software. A series of appropriate slices were imported to generate 3D ortho slice and allow the software to process interactive thresholding, following the thresholded images can be obtained (Fig. S9a). Then the surface was extracted by generating surface module (Fig. S9b) and the curvature could be calculated. The more accurate thresholded images can be produced by adjusting interactive thresholding module to resemble to the original bijel as well as reducing the occurrence of surface discontinuities.

## 2. Supplementary Figures, Table and Video

**Table S1** The interface tension of water-oil (PDMS-AR) interface under different additives.

| Interface                                                                        | Interface tension (mN m <sup>-1</sup> ) |
|----------------------------------------------------------------------------------|-----------------------------------------|
| Water/PDMS-AR                                                                    | 22.06 ± 0.01                            |
| SiO <sub>2</sub> (0.5 wt%) in water/PDMS-AR                                      | 21.51 ± 0.03                            |
| SiO <sub>2</sub> (0.5 wt%) in water/diNH <sub>2</sub> -PDMS (7.5 wt%) in PDMS-AR | 5.20 ± 0.01                             |

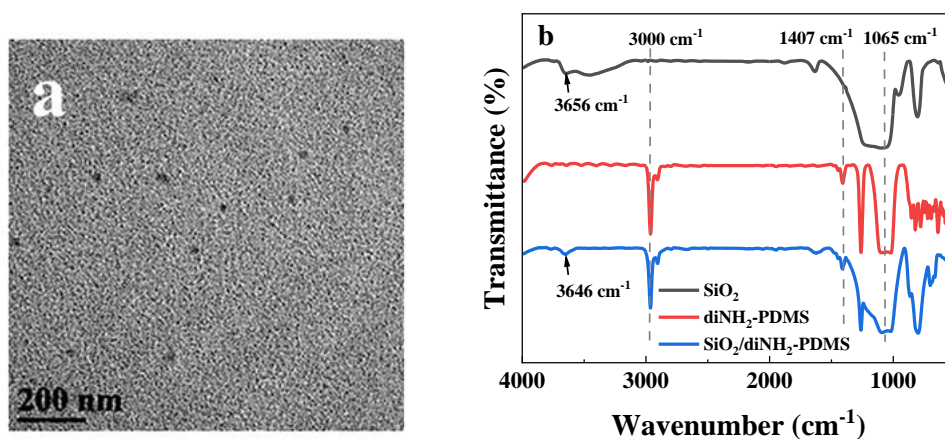

**Fig. S1** (a) TEM image of primitive SiO<sub>2</sub> particles; (b) FT-IR spectra of SiO<sub>2</sub>, diNH<sub>2</sub>-PDMS and SiO<sub>2</sub>/diNH<sub>2</sub>-PDMS mixtures.

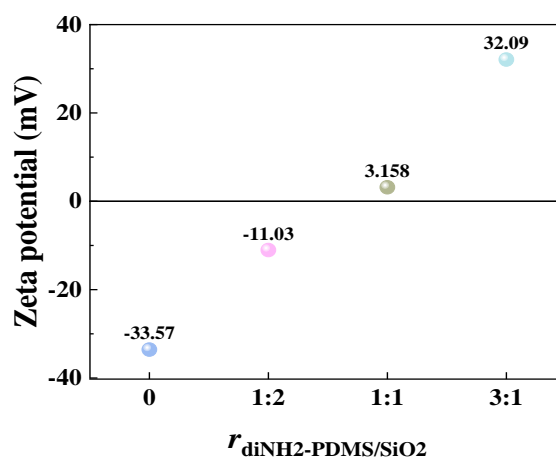

**Fig. S2** Zeta potential of SiO<sub>2</sub> particles at different mass ratios ( $r$ ) of diNH<sub>2</sub>-PDMS to SiO<sub>2</sub> particles. pH = 7.

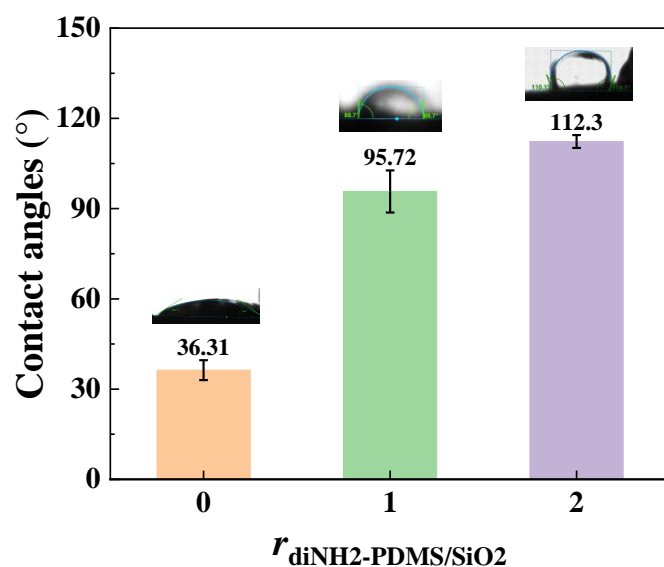

**Fig. S3** The water-(PDMS-AR)-particle contact angles of stabilizers with different mass ratios of diNH<sub>2</sub>-PDMS to SiO<sub>2</sub> at pH = 7. T = 25.0 °C.

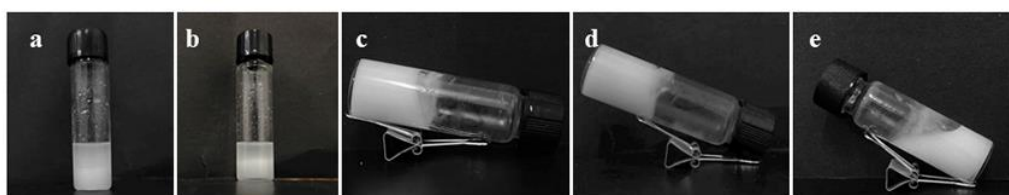

**Fig. S4** Photographs of samples stabilized by (a) SiO<sub>2</sub> (15 mg g<sup>-1</sup>), (b) diNH<sub>2</sub>-PDMS (75 mg g<sup>-1</sup>), (c) SiO<sub>2</sub>/diNH<sub>2</sub>-PDMS (mass concentration, 15/15 mg g<sup>-1</sup>), (d) SiO<sub>2</sub>/diNH<sub>2</sub>-PDMS (mass concentration, 15/75 mg g<sup>-1</sup>) and (e) SiO<sub>2</sub>/diNH<sub>2</sub>-PDMS (mass concentration, 15/200 mg g<sup>-1</sup>). pH = 7.

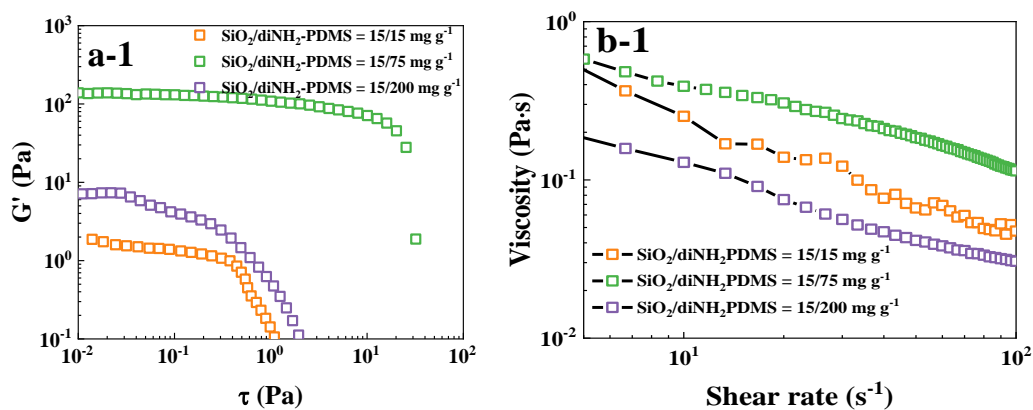

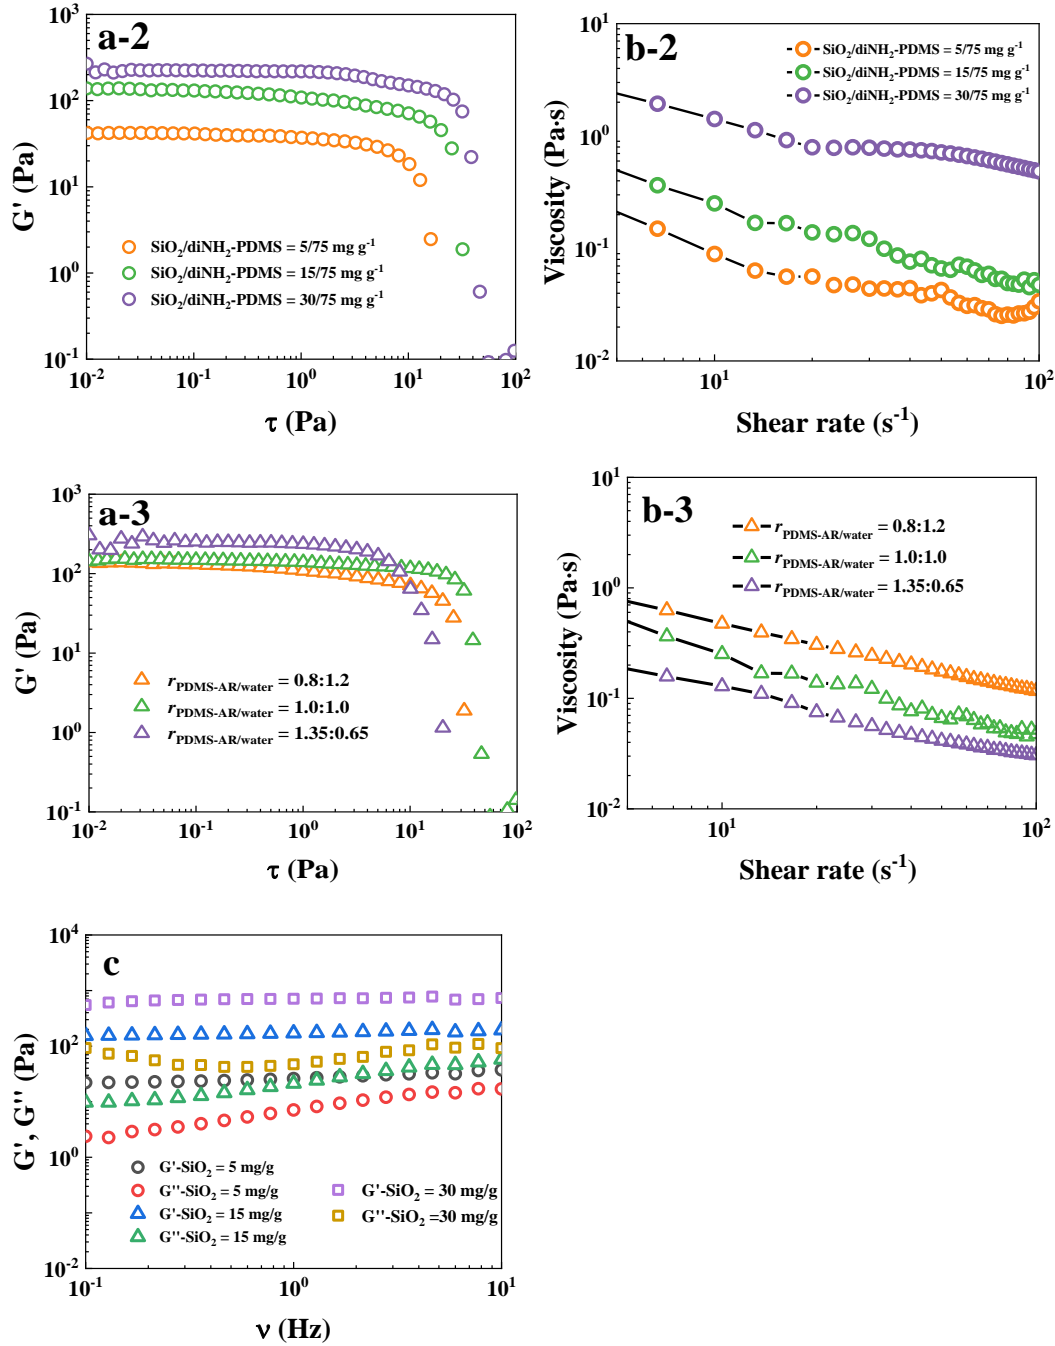

**Fig. S5** (a) Stress sweep and (b) steady-state shear of emulsion samples: (a-1, b-1)  $15 \text{ mg g}^{-1} \text{ SiO}_2$  with different concentrations of diNH<sub>2</sub>-PDMS; (a-2, b-2)  $75 \text{ mg g}^{-1} \text{ diNH}_2\text{-PDMS}$  with different concentrations of SiO<sub>2</sub>; (a-3, b-3)  $15 \text{ mg g}^{-1} \text{ SiO}_2$  and  $75 \text{ mg g}^{-1} \text{ diNH}_2\text{-PDMS}$  with different mass ratios ( $r_{\text{PDMS-AR/water}}$ ) of PDMS-AR to water; (c) frequency sweep of emulsion samples stabilized by  $75 \text{ mg g}^{-1} \text{ diNH}_2\text{-PDMS}$  with different concentrations of SiO<sub>2</sub>,  $r_{\text{PDMS-AR/water}} = 1:1$ .

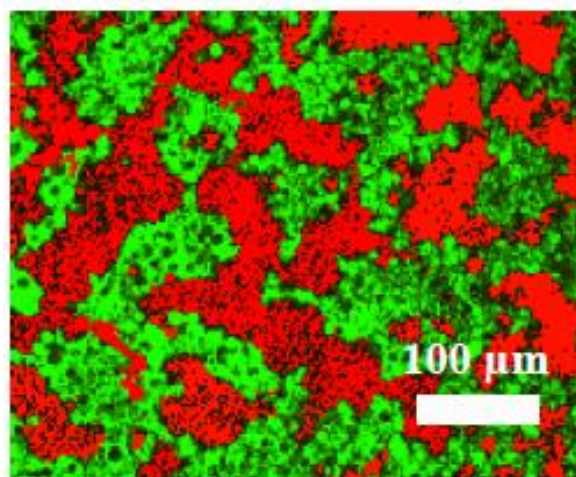

**Fig. S6** The laser confocal microscopy image of Bijel stabilized by  $15 \text{ mg g}^{-1} \text{ SiO}_2$  with  $75 \text{ mg g}^{-1} \text{ diNH}_2\text{-PDMS}$  at  $r_{\text{PDMS-AR/water}} = 1:1$ . The oil and water were stained by ROT 300 and fluorescein sodium (FLS) with the red and green emission, respectively.

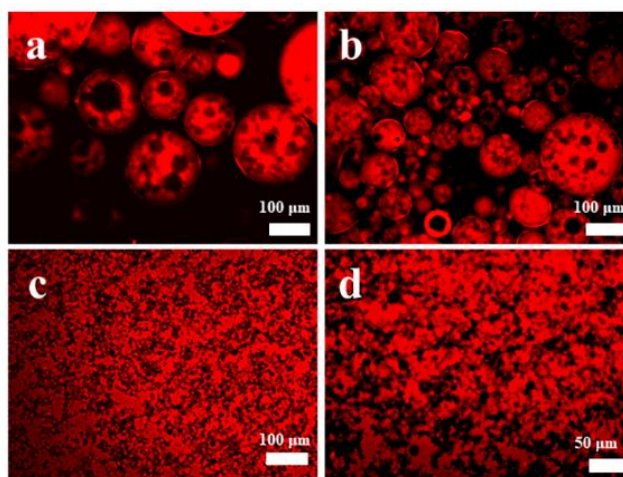

**Fig. S7** Inverted fluorescence microscopy images of sample under specific shear force applied at different durations (a) 15 s, (b) 30 s, (c) 60 s and (d) 120 s. Emulsion was stabilized by  $15 \text{ mg g}^{-1} \text{ SiO}_2$  with  $75 \text{ mg g}^{-1} \text{ diNH}_2\text{-PDMS}$ ,  $r_{\text{PDMS-AR/water}} = 1:1$ . The oil was stained by ROT 300 with the red emission.

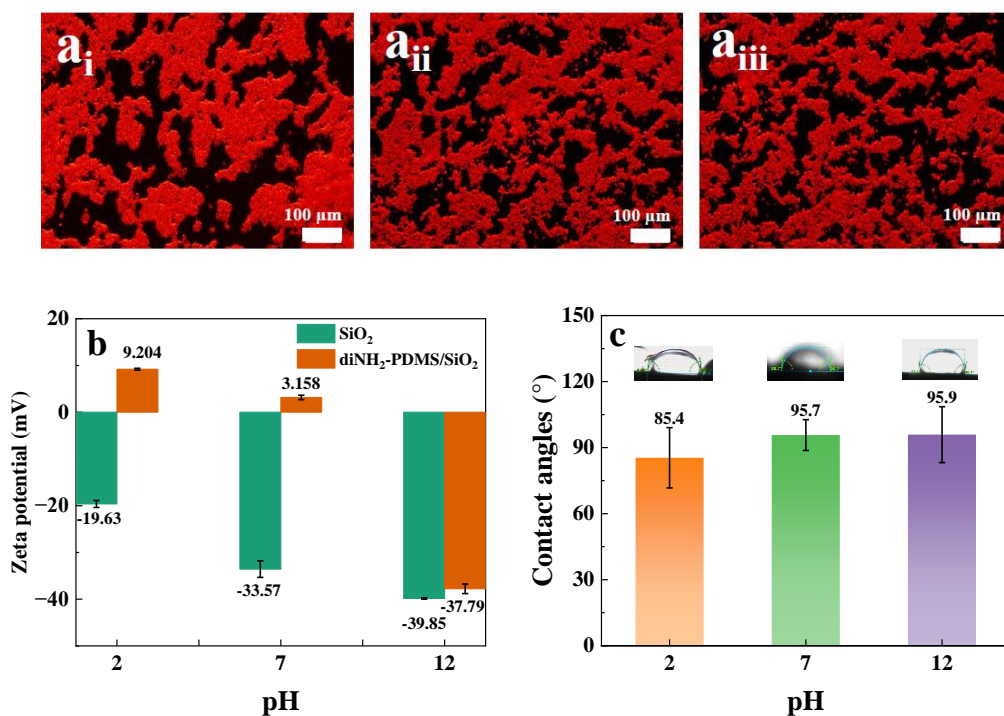

**Fig. S8** Laser confocal microscopy images of Bijels at different pH: (a<sub>i</sub>) pH = 2, (a<sub>ii</sub>) pH = 7 and (a<sub>iii</sub>) pH = 12; (b) zeta potential of SiO<sub>2</sub> and diNH<sub>2</sub>-PDMS/SiO<sub>2</sub> at different pH; (c) water-(PDMS-AR)-particle contact angles at different pH ( $r_{\text{diNH}_2\text{-PDMS/SiO}_2} = 1:1$ ). Emulsions were stabilized by 15 mg g<sup>-1</sup> SiO<sub>2</sub> with 75 mg g<sup>-1</sup> diNH<sub>2</sub>-PDMS,  $r_{\text{PDMS-AR/water}} = 1:1$ . The oil was stained by ROT 300 with red emission.

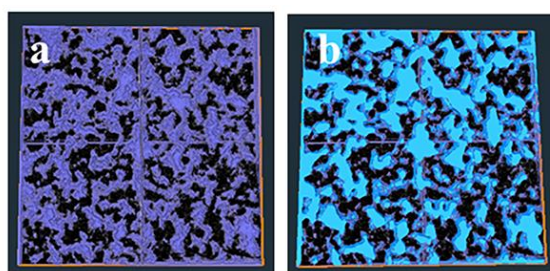

**Fig. S9** (a) Thresholded bijel image and (b) extracted surface image by Avizo software.

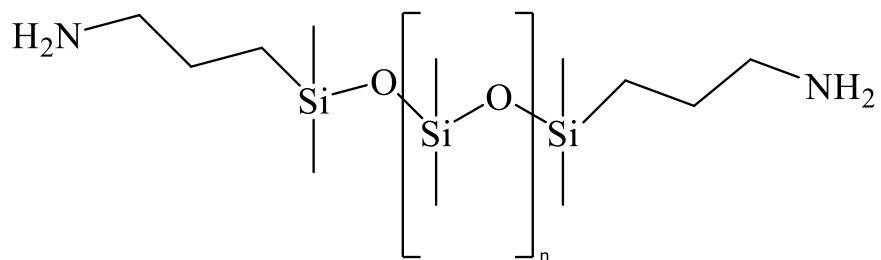

**Scheme S1** The chemical structure of diNH<sub>2</sub>-PDMS.

**Video S1** The reconstruction movie of bijel sample by imageJ software.

### References

1. M. Reeves, K. Stratford and J. H. Thijssen, *Soft Matter*, 2016, **12**, 4082-4092.
